# Supplementary material for: A New Benzoxazole-Based Fluorescent Macrocyclic Chemosensor for Optical Detection of Zn2+ and Cd2+
Source: MDPI journal article supplement (doi:10.3390/chemosensors10050188), 2022-05-17
Supplement: s1 [file s1]

*Supplementary Material*

# **A new benzoxazole-based fluorescent macrocyclic chemosensor for optical detection of Zn<sup>2+</sup> and Cd<sup>2+</sup>**

**Daniele Paderni <sup>1†</sup>, Luca Giorgi <sup>1†</sup>, Maria Voccia <sup>2</sup>, Mauro Formica <sup>1</sup>, Lucia Caporaso <sup>2</sup>, Eleonora Macedi <sup>1,\*</sup>, Vieri Fusi <sup>1,\*</sup>**

<sup>1</sup> Department of Pure and Applied Sciences, University of Urbino, via della Stazione, 4, 61029 Urbino, Italy; [eleonora.macedi@uniurb.it](mailto:eleonora.macedi@uniurb.it) (E.M.)

<sup>2</sup> Department of Chemistry and Biology, University of Salerno, via Giovanni Paolo II, 132, 84084 Fisciano (Salerno), Italy; [lcaporaso@unisa.it](mailto:lcaporaso@unisa.it) (L.C.)

\* Correspondence: [vieri.fusi@uniurb.it](mailto:vieri.fusi@uniurb.it) (V.F.)

† These authors contributed equally to this work.

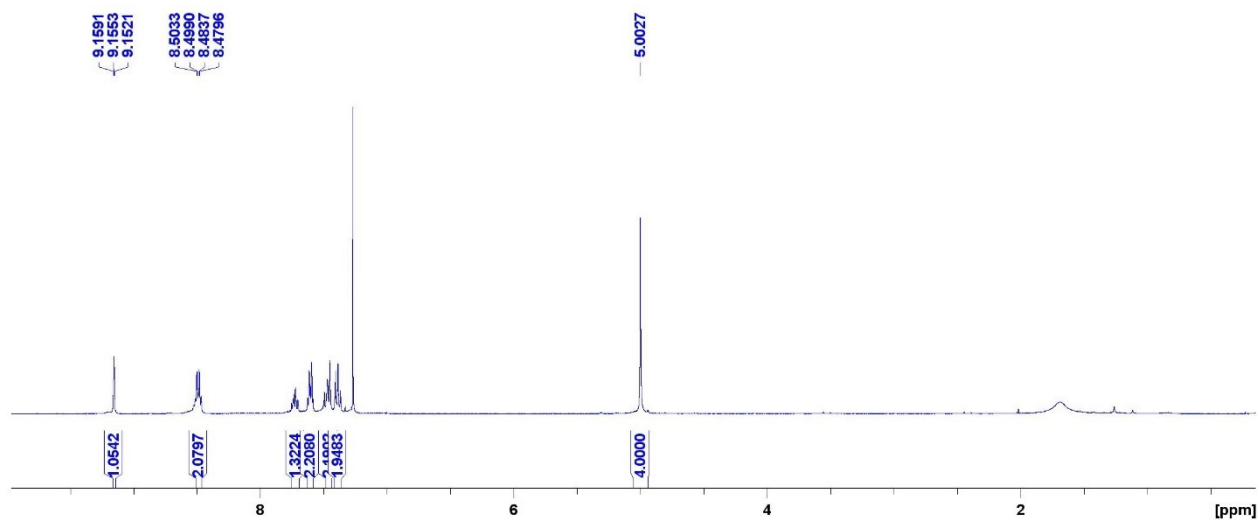

Figure S1. <sup>1</sup>H NMR spectrum of 4 in CDCl<sub>3</sub>.

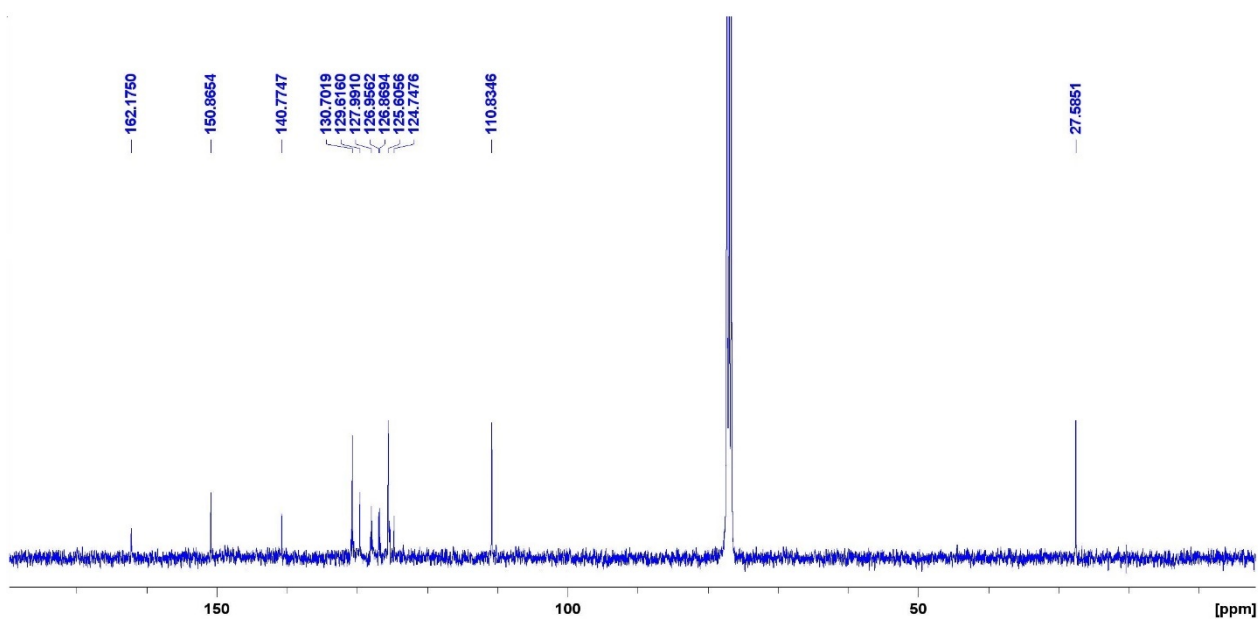

Figure S2. <sup>13</sup>C NMR spectrum of compound 4 in CDCl<sub>3</sub>.

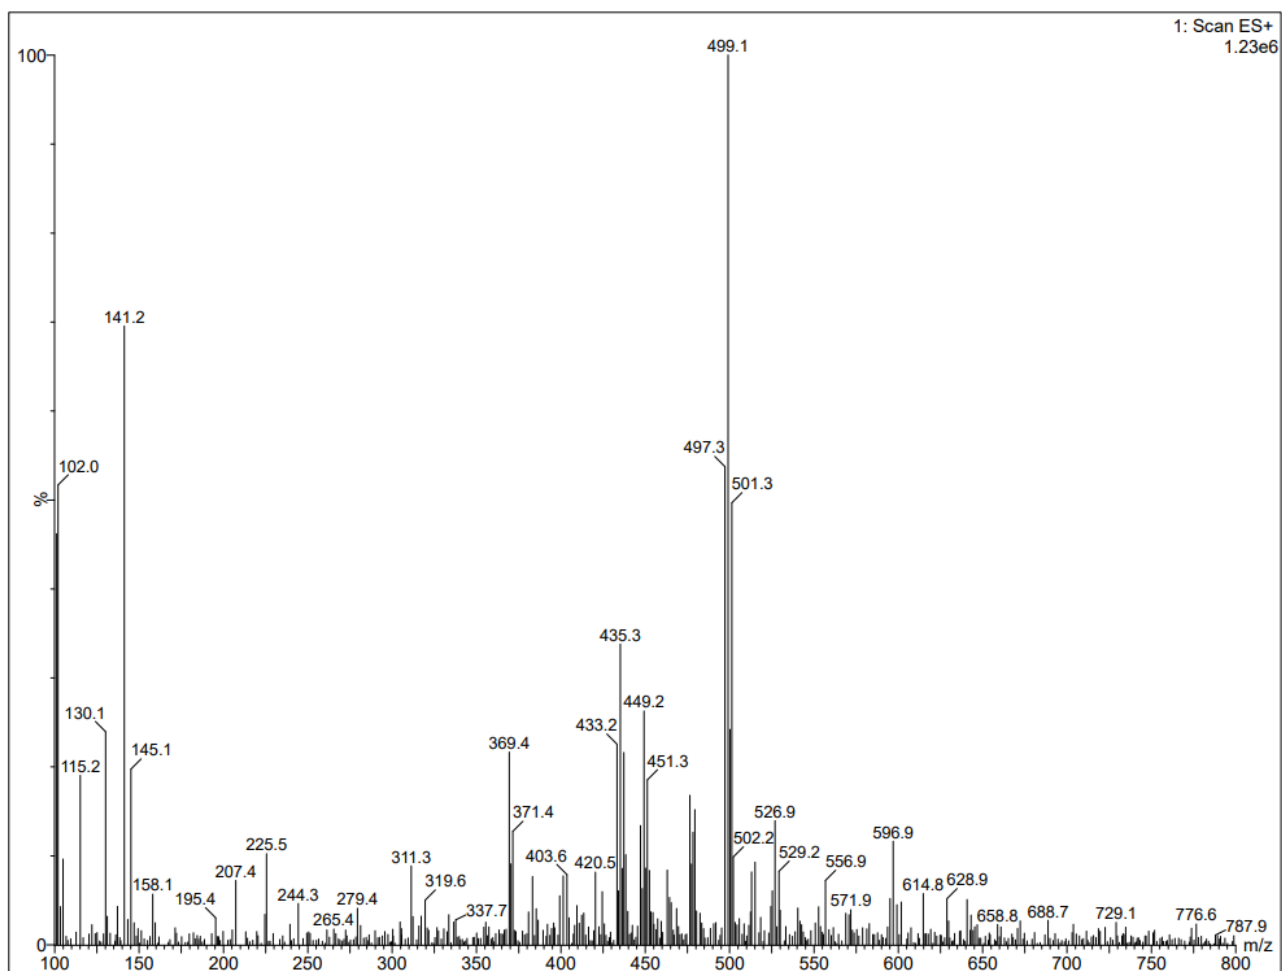

**Figure S3.** MS-ESI spectrum of compound 4.

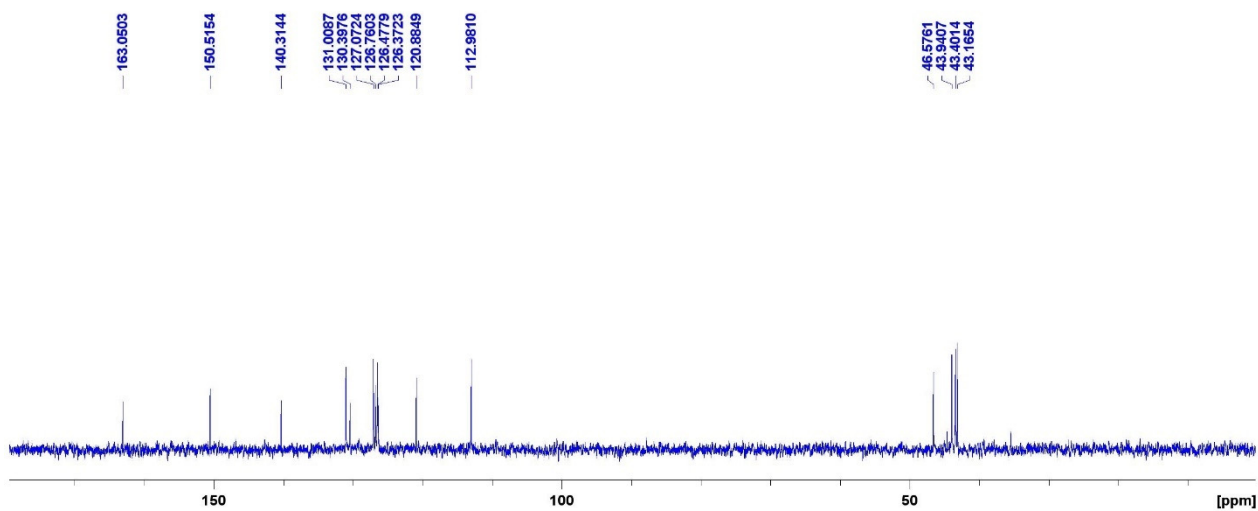

**Figure S4.**  $^{13}\text{C}$  NMR spectrum of ligand L in  $\text{D}_2\text{O}$ .  $[\text{L}] = 7.7 \times 10^{-3} \text{ mol dm}^{-3}$ .

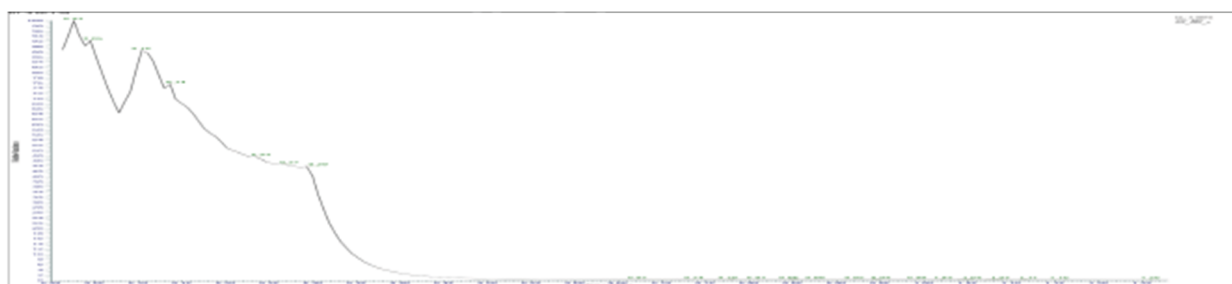

m/z 482.2 #59 RT: 0.39 AV: 1 NL: 1.00E7  
T: FTMS + p ESI Full ms2 483.2400@hcd15.00 [100.7850-1007.8496]

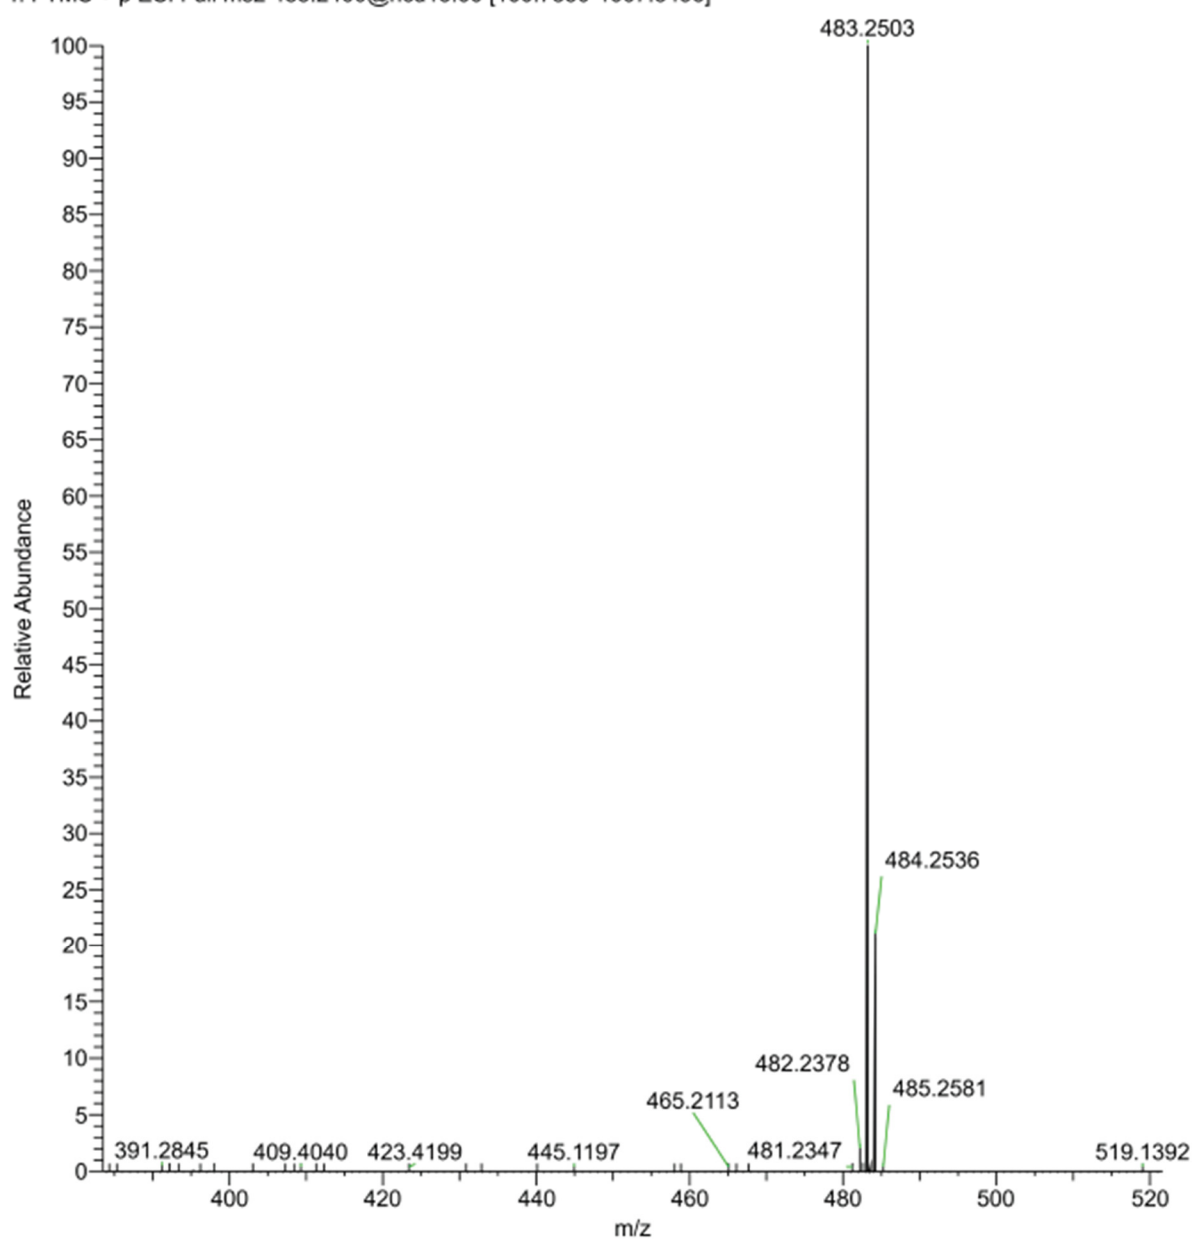

Figure S5. HRMS spectrum of L.

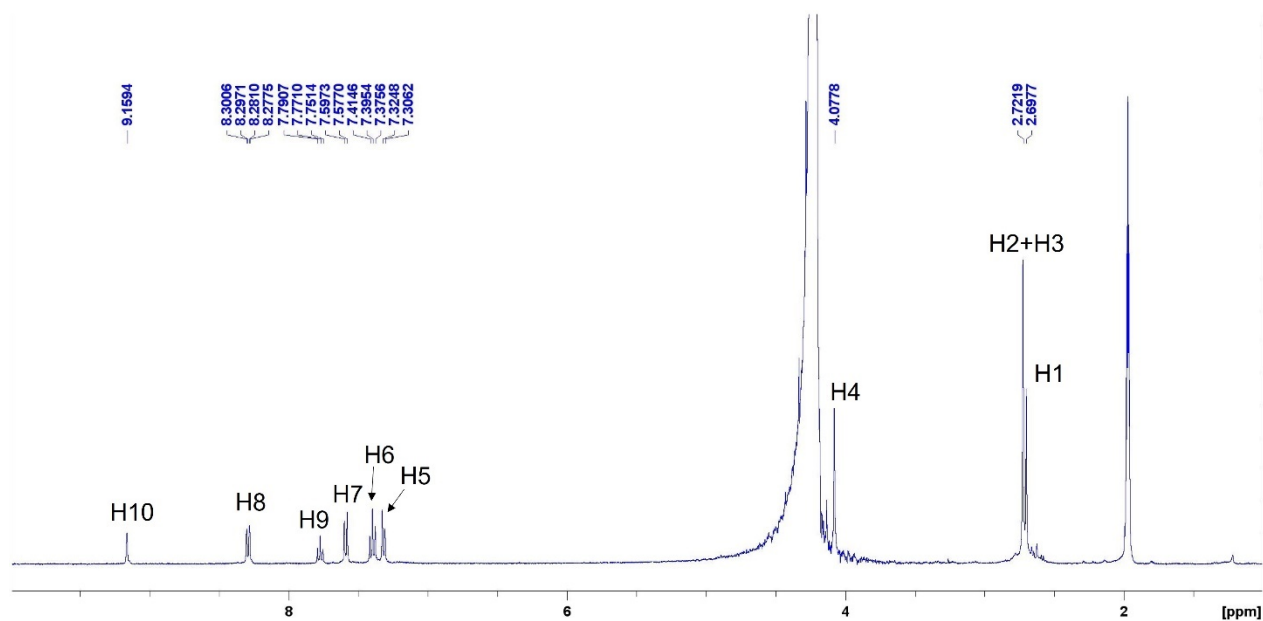

**Figure S6.**  $^1\text{H}$  NMR spectrum of **L** at pH 12 in  $\text{D}_2\text{O}$ .  $[\text{L}] = 5 \times 10^{-3} \text{ mol dm}^{-3}$ . See Figure 1 in the main text for protons assignment.

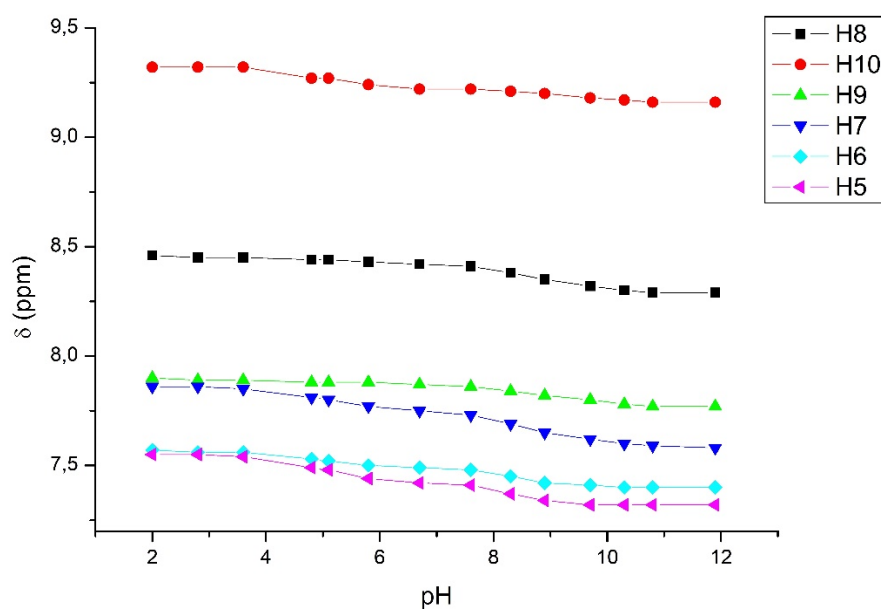

**Figure S7.** Trend of selected  $^1\text{H}$  NMR signals of aromatic **L** protons in an acetonitrile- $d_3$ / $\text{D}_2\text{O}$  60:40 solution as a function of the pH.  $[\text{L}] = 5 \times 10^{-3} \text{ mol dm}^{-3}$ .

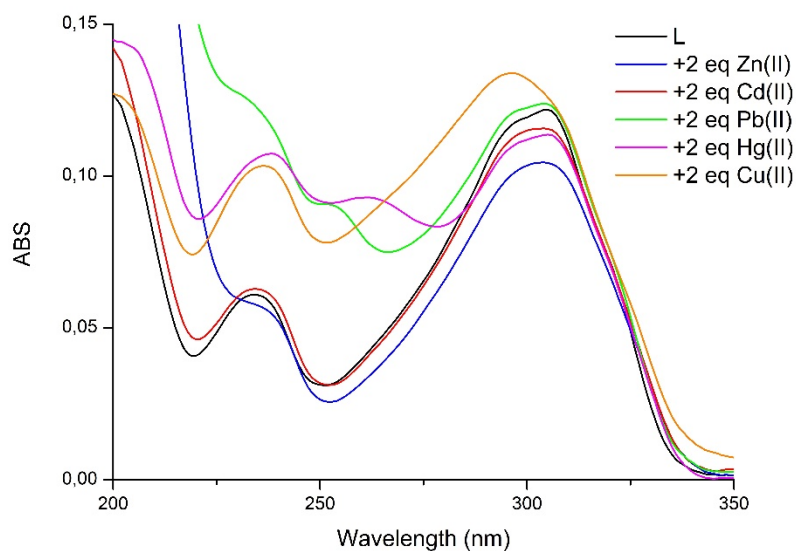

**Figure S8.** UV-Vis absorption spectra of **L** registered upon addition of 2 equivalents of different metal cations (Zn(II), Cd(II), Pb(II), Hg(II), Cu(II)). [**L**] =  $3.2 \times 10^{-6}$  mol dm<sup>-3</sup> (ACN/aqueous HEPES pH 7.4, 4:1 v/v solvent mixture).

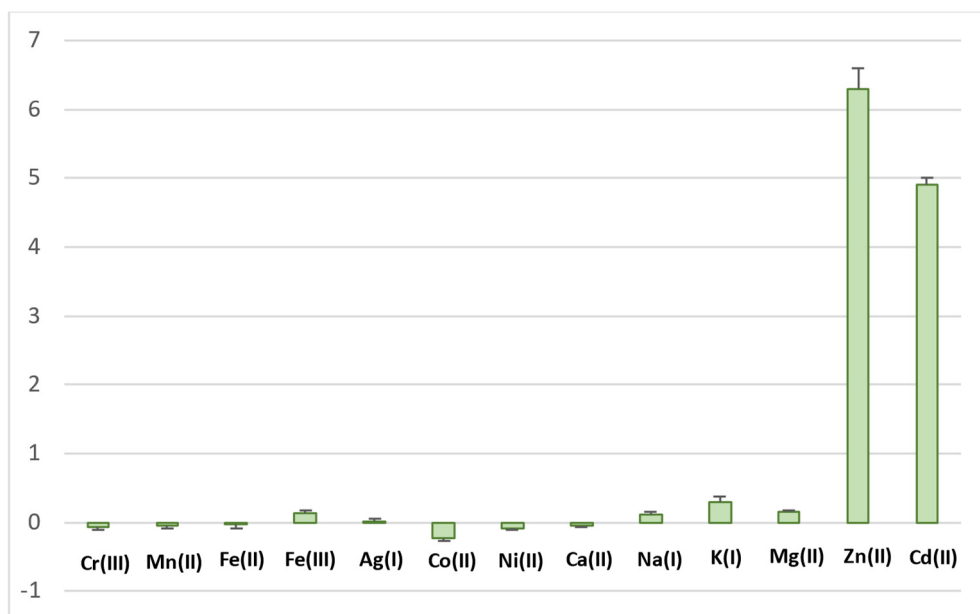

**Figure S9.** Bar-plot showing the emission of **L** upon addition of 2 equivalents of different metal cations (Fe<sup>2+</sup>, Fe<sup>3+</sup>, Co<sup>2+</sup>, Cr<sup>3+</sup>, Ni<sup>2+</sup>, Ag<sup>+</sup>, Mn<sup>2+</sup>, Mg<sup>2+</sup>, Ca<sup>2+</sup>, Na<sup>+</sup>, K<sup>+</sup>). The response to Zn<sup>2+</sup> and Cd<sup>2+</sup> has been reported as a reference.  $I$  and  $I_0$  are the emission intensities of the ligand in the presence and absence of the metal ions, respectively. [**L**] =  $3.2 \times 10^{-6}$  mol dm<sup>-3</sup> (ACN/aqueous HEPES (pH 7.4) 4:1 v/v solvent mixture).  $\lambda_{\text{ex}}$  = 305 nm.  $\lambda_{\text{em}}$  = 385 nm (Zn<sup>2+</sup>), 390 nm (Cd<sup>2+</sup>), 402 nm for all other tested metal ions.

## Determination of LOD, LOQ and LOL [1]

LOD and LOQ were determined using the linear regression method, that consist in calculating a calibration curve measuring the fluorescence response  $Y$  of a series of standard solutions of the analyte of concentration  $X$ . This method assumes that the instrument response  $Y$  is linearly related to the standard concentration  $X$  for a limited range of concentration, and it can be expressed using the equation of the line  $Y=A+BX$  as a mathematic model. The two parameters  $A$  and  $B$ , that are the intercept and the slope of the line, respectively, were calculated with the minimum square method together with their respective standard deviations  $S_A$  and  $S_B$ . In our case the response is the ratio between the emission intensity of each sample and the emission intensity of the blank at 385 nm ( $Zn^{2+}$ ) and 390 nm ( $Cd^{2+}$ ) by exciting at 305 nm.

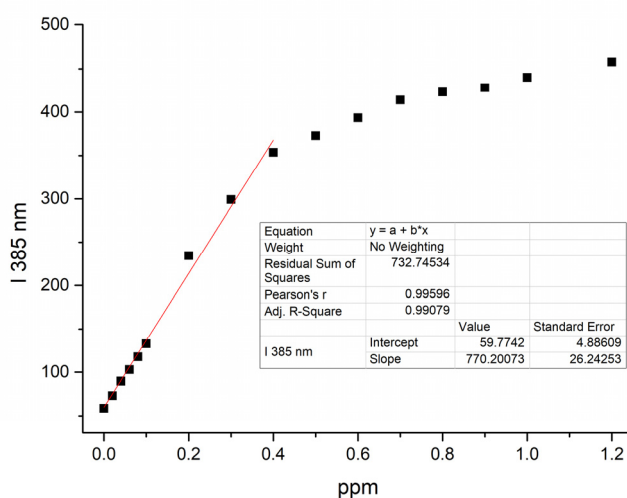

**Figure S10.** Trend of the emission intensity at 385 nm ( $\lambda_{ex}=305$  nm) upon increasing amounts of  $Zn^{2+}$ , as described in the main text. Inset: linear regression from 0 to 0.4 ppm.

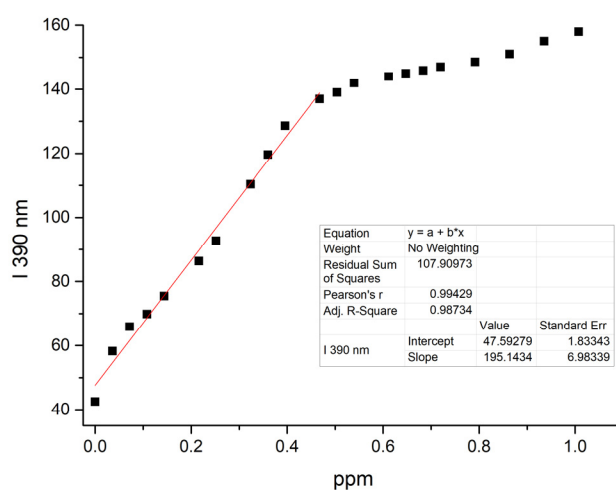

**Figure S11.** Trend of the emission intensity at 390 nm ( $\lambda_{ex}=305$  nm) upon increasing amounts of  $Cd^{2+}$ , as described in the main text. Inset: linear regression from 0 to 0.45 ppm.

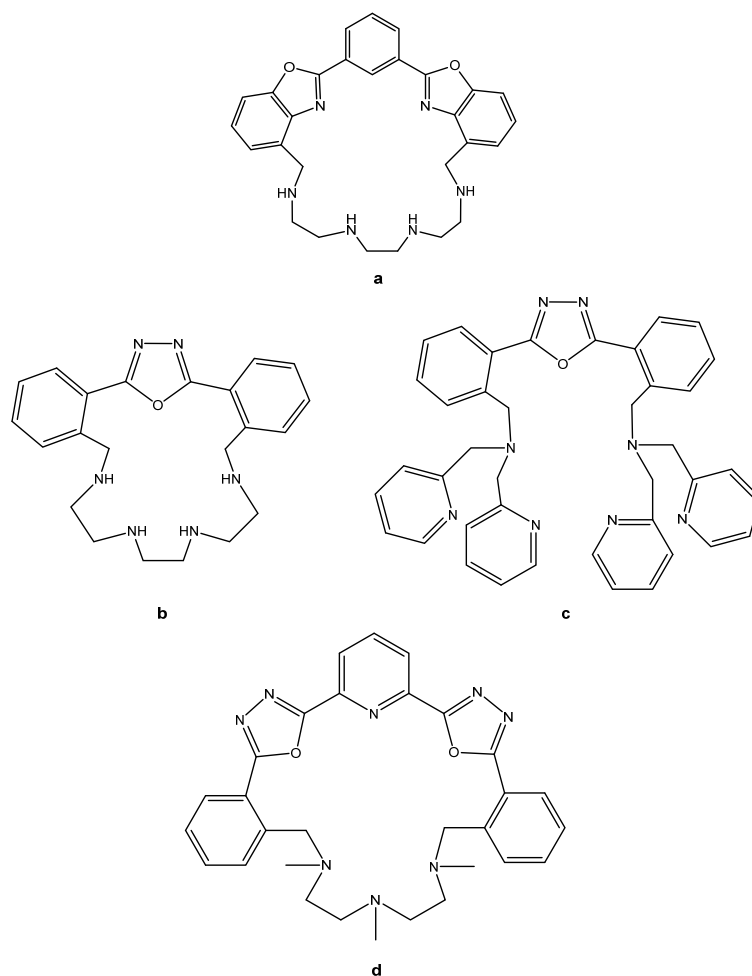

**Figure S12.** Molecular structures of **L (a)** and the similar systems cited in the main text (**b-d**).

**Table S1.** Experimental parameters of **L** and similar systems and their complexes with  $\text{Zn}^{2+}$  and  $\text{Cd}^{2+}$ , where applicable.

| Compound     | Experimental conditions                                                                              | $\lambda_{\text{ex}}$ (nm) | $\lambda_{\text{em}}$ (nm)                                  | Stokes-shift ( $\text{cm}^{-1}$ )                              | $\Phi_{\text{em}}$                                                    | Ref.      |
|--------------|------------------------------------------------------------------------------------------------------|----------------------------|-------------------------------------------------------------|----------------------------------------------------------------|-----------------------------------------------------------------------|-----------|
| <b>a (L)</b> | ACN:HEPES buffer pH 7.4 4:1 v/v,<br>[L] = $3.2 \cdot 10^{-6}$                                        | 305                        | 402<br>+ $\text{Zn}^{2+}$ = 385<br>+ $\text{Cd}^{2+}$ = 390 | 7910<br>+ $\text{Zn}^{2+}$ = 6810<br>+ $\text{Cd}^{2+}$ = 7150 | 0.006<br>+ 2 $\text{Zn}^{2+}$ = 0.036<br>+ 1 $\text{Cd}^{2+}$ = 0.015 | This work |
| <b>b</b>     | HEPES buffer pH 7.4 ( $\text{Zn}^{2+}$ ) and pH 8.6 ( $\text{Cd}^{2+}$ ),<br>[L] = $1 \cdot 10^{-5}$ | 280                        | 349<br>+ $\text{Zn}^{2+}$ = 361<br>+ $\text{Cd}^{2+}$ = 358 | 5830<br>+ $\text{Zn}^{2+}$ = 6780<br>+ $\text{Cd}^{2+}$ = 6550 |                                                                       | [2,3]     |
| <b>c</b>     | EtOH: HEPES buffer pH 7.4 1:1 v/v,<br>[L] = $2 \cdot 10^{-5}$                                        | 277                        | 355<br>+ $\text{Cd}^{2+}$ = 358                             | 7900<br>+ $\text{Cd}^{2+}$ = 8200                              |                                                                       | [4]       |
| <b>d</b>     | ACN:HEPES buffer pH 7.0 3:7 v/v,<br>[L] = $2 \cdot 10^{-5}$                                          | 306                        | 358<br>+ $\text{Zn}^{2+}$ = 358<br>+ $\text{Cd}^{2+}$ = 358 | 4750                                                           | 0.01                                                                  | [5]       |



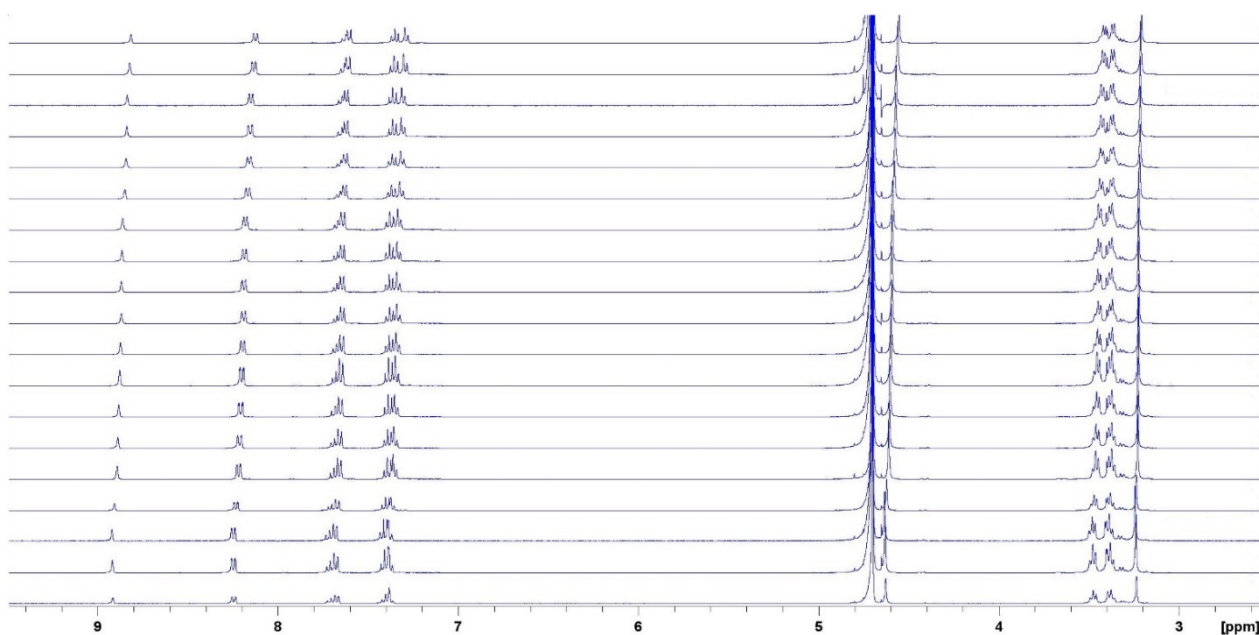

**Figure S13.**  $^1\text{H}$  NMR spectra of **L** recorded in  $\text{D}_2\text{O}$  at pH 7.4 upon addition of  $\text{Zn}(\text{ClO}_4)_2$  up to 3 equivalents.  $[\text{L}] = 5 \times 10^{-3} \text{ mol dm}^{-3}$ .

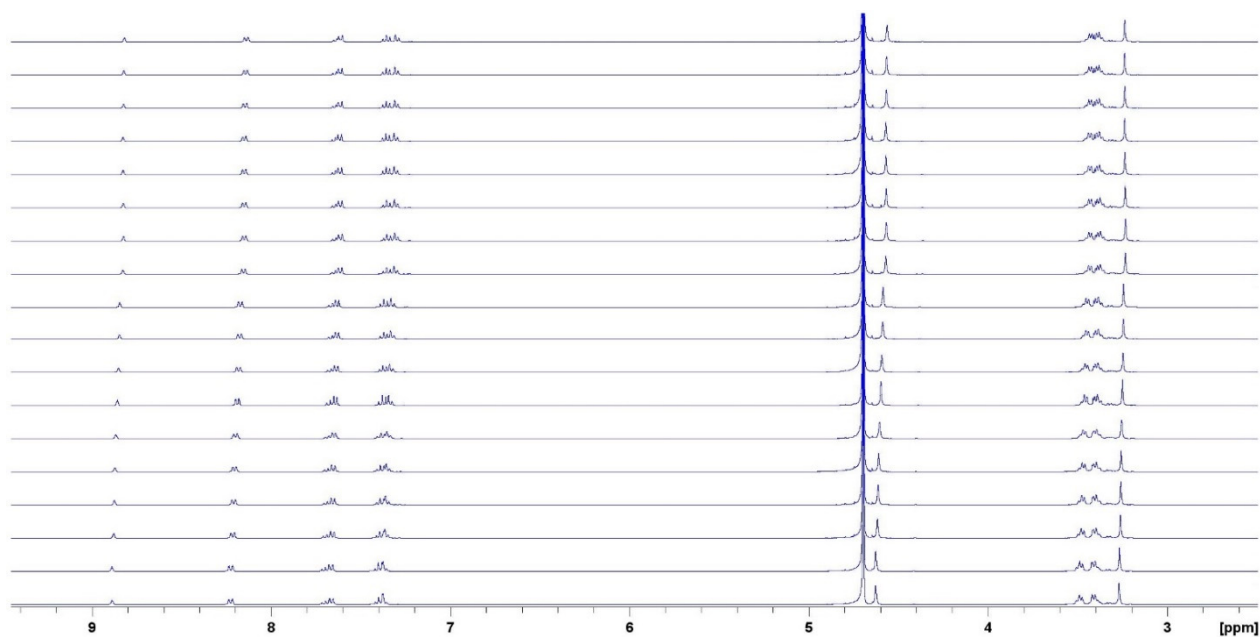

**Figure S14.**  $^1\text{H}$  NMR spectra of **L** recorded in  $\text{D}_2\text{O}$  at pH 7.4 upon addition of  $\text{Cd}(\text{ClO}_4)_2$  up to 2 equivalents.  $[\text{L}] = 5 \times 10^{-3} \text{ mol dm}^{-3}$ .

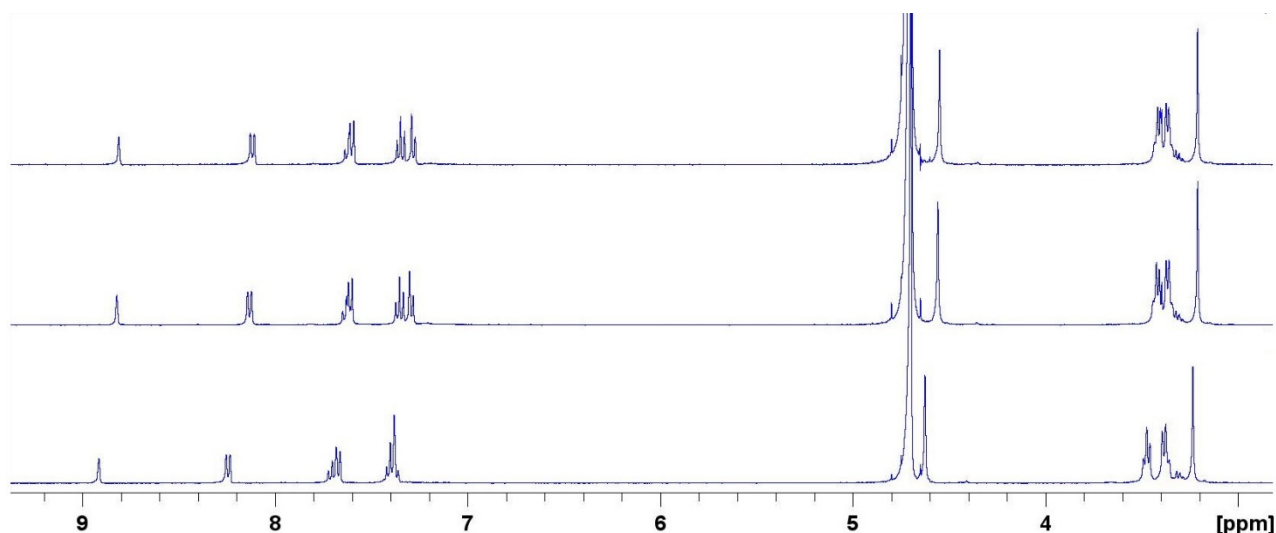

**Figure S15.**  $^1\text{H}$  NMR spectra of **L** (bottom), **L** + 2 equivalents of  $\text{Zn}^{2+}$  (middle), **L** + 2 equivalents of  $\text{Zn}^{2+}$  + 2 equivalents  $\text{Cd}^{2+}$  (top) recorded in  $\text{D}_2\text{O}$  at pH 7.4.  $[\text{L}] = 5 \times 10^{-3} \text{ mol dm}^{-3}$ .

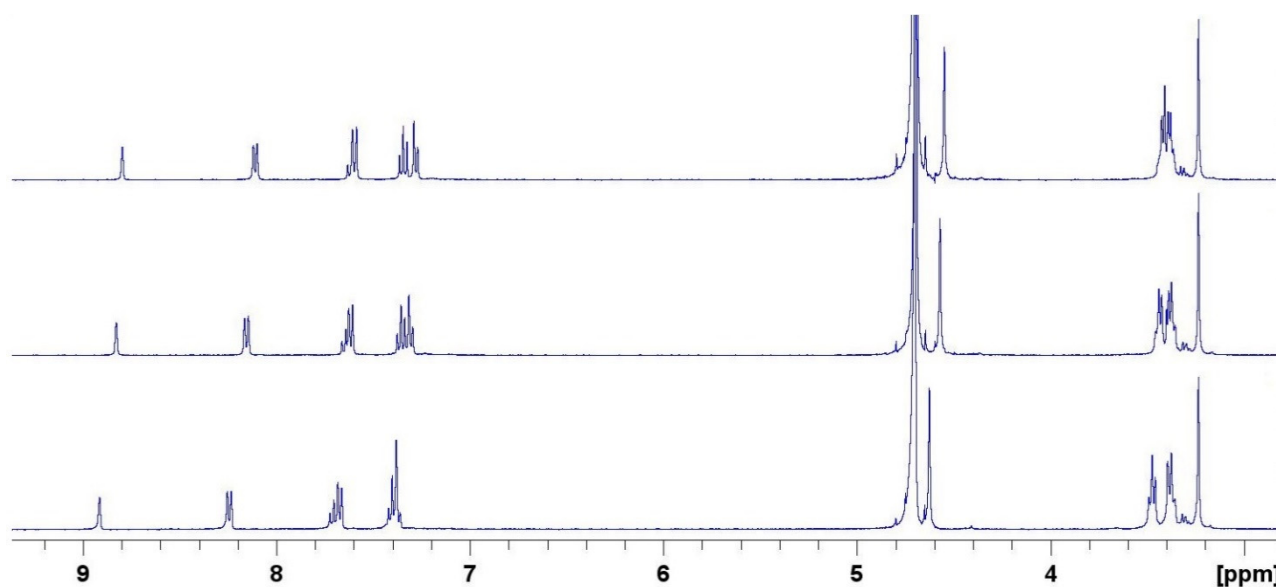

**Figure S16.**  $^1\text{H}$  NMR spectra of **L** (bottom), **L** + 1 equivalents of  $\text{Cd}^{2+}$  (middle), **L** + 1 equivalents of  $\text{Cd}^{2+}$  + 1 equivalents of  $\text{Zn}^{2+}$  (top) recorded in  $\text{D}_2\text{O}$  at pH 7.4.  $[\text{L}] = 5 \times 10^{-3} \text{ mol dm}^{-3}$ .

## Computational details

All the DFT geometry optimizations were performed at the GGA BP86 [6–8] and B3LYP [9–11] level with the Gaussian09 package [12]. The electronic configuration of the systems was described with the standard triple- $\zeta$  TZVP basis set with a polarization function of Ahlrichs and co-workers for H, C, N, F, and O while for Zn and Cd the quasi relativistic LANL2DZ ECP effective core potential was adopted [13]. The geometry optimizations were performed without symmetry constraints, and the characterization of the located stationary points was performed by analytical frequency calculations.

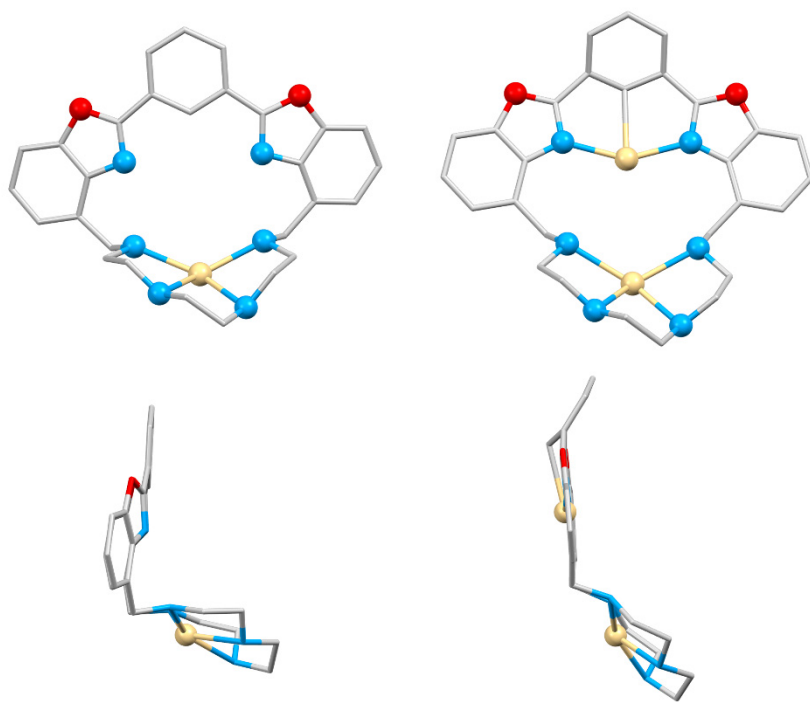

**Figure S17.** Front view (top) and side view (bottom) of the computed structures of (from left to right) [CdL]<sup>2+</sup> and [Cd<sub>2</sub>L]<sup>4+</sup>.

## Cartesian coordinates and energies of calculated structures

|                                                            |              |             |              |   |              |              |              |
|------------------------------------------------------------|--------------|-------------|--------------|---|--------------|--------------|--------------|
| <b>L</b>                                                   |              |             |              | H | -2.320815000 | 1.519313000  | 0.575553000  |
| Zero-point correction = 0.532590 (Hartree/Particle)        |              |             |              | H | -1.584608000 | 4.225645000  | 0.059379000  |
| Thermal correction to Energy = 0.563661                    |              |             |              | H | 2.130743000  | 4.753959000  | 0.399776000  |
| Thermal correction to Enthalpy = 0.564605                  |              |             |              | H | 2.272550000  | 1.483230000  | 0.959010000  |
| Thermal correction to Gibbs Free Energy = 0.468812         |              |             |              | N | 2.636372000  | -0.991839000 | 0.530227000  |
| Sum of electronic and zero-point Energies = -1563.478247   |              |             |              | O | 3.652559000  | -2.776811000 | -0.467094000 |
| Sum of electronic and thermal Energies = -1563.447176      |              |             |              | C | 4.021903000  | -0.805171000 | 0.562533000  |
| Sum of electronic and thermal Enthalpies = -1563.446232    |              |             |              | C | 4.792061000  | 0.256432000  | 1.091846000  |
| Sum of electronic and thermal Free Energies = -1563.542024 |              |             |              | C | 6.184006000  | 0.128834000  | 0.938873000  |
| N                                                          | 3.058407000  | 2.132781000 | 1.083404000  | H | 6.827044000  | 0.928420000  | 1.325185000  |
| N                                                          | 1.487813000  | 4.216303000 | -0.189670000 | C | 6.788948000  | -0.987817000 | 0.314166000  |
| N                                                          | -1.359534000 | 3.677134000 | -0.776721000 | H | 7.879837000  | -1.025195000 | 0.229436000  |
| N                                                          | -3.055301000 | 2.183971000 | 0.844898000  | C | 6.026757000  | -2.047689000 | -0.205191000 |
| C                                                          | 3.450032000  | 2.678986000 | -0.218723000 | H | 6.480535000  | -2.914978000 | -0.690943000 |
| H                                                          | 3.955280000  | 1.941815000 | -0.886996000 | C | 4.646724000  | -1.909474000 | -0.058052000 |
| H                                                          | 4.192189000  | 3.485862000 | -0.037490000 | C | 2.473041000  | -2.146359000 | -0.076051000 |
| C                                                          | 2.250825000  | 3.252759000 | -0.983463000 | C | 1.218280000  | -2.828819000 | -0.388228000 |
| H                                                          | 2.643141000  | 3.687778000 | -1.937876000 | C | 1.210690000  | -4.101263000 | -1.007371000 |
| H                                                          | 1.577594000  | 2.421876000 | -1.276212000 | H | 2.158226000  | -4.586848000 | -1.255347000 |
| C                                                          | 0.665275000  | 5.124112000 | -0.985927000 | C | -0.008132000 | -4.728572000 | -1.297084000 |
| H                                                          | 1.238541000  | 5.666147000 | -1.782700000 | H | -0.010652000 | -5.713473000 | -1.774636000 |
| H                                                          | 0.263910000  | 5.898810000 | -0.303550000 | C | -1.223776000 | -4.106500000 | -0.982959000 |
| C                                                          | -0.512715000 | 4.429272000 | -1.692220000 | H | -2.174361000 | -4.595358000 | -1.212468000 |
| H                                                          | -1.065905000 | 5.219508000 | -2.263973000 | C | -1.223135000 | -2.833587000 | -0.365948000 |
| H                                                          | -0.125025000 | 3.729588000 | -2.461153000 | C | -0.000483000 | -2.199585000 | -0.068527000 |
| C                                                          | -2.577467000 | 3.156387000 | -1.392377000 | N | -2.611132000 | -0.968610000 | 0.527397000  |
| H                                                          | -2.313050000 | 2.249547000 | -1.976657000 | O | -3.663972000 | -2.799026000 | -0.341102000 |
| H                                                          | -3.044616000 | 3.864004000 | -2.123449000 | C | -3.993179000 | -0.784390000 | 0.614990000  |
| C                                                          | -3.647808000 | 2.799792000 | -0.346751000 | C | -4.734721000 | 0.302554000  | 1.132277000  |
| H                                                          | -4.172079000 | 3.723385000 | -0.021505000 | C | -6.132198000 | 0.171983000  | 1.054882000  |
| H                                                          | -4.416934000 | 2.167646000 | -0.850075000 | H | -6.756959000 | 0.987664000  | 1.437172000  |
| C                                                          | -4.022245000 | 1.517477000 | 1.722258000  | C | -6.764338000 | -0.972055000 | 0.509327000  |
| H                                                          | -4.780019000 | 2.258311000 | 2.042193000  | H | -7.858004000 | -1.011945000 | 0.478456000  |
| H                                                          | -3.480413000 | 1.202030000 | 2.634083000  | C | -6.028311000 | -2.055922000 | 0.000940000  |
| C                                                          | 4.140328000  | 1.445992000 | 1.795127000  | H | -6.506530000 | -2.942206000 | -0.423225000 |
| H                                                          | 3.728666000  | 1.102634000 | 2.763474000  | C | -4.642244000 | -1.915170000 | 0.074770000  |
| H                                                          | 4.929790000  | 2.185414000 | 2.033693000  | C | -2.470493000 | -2.148653000 | -0.032672000 |
|                                                            |              |             |              | H | 0.001115000  | -1.215399000 | 0.406987000  |

## Zn<sup>2+</sup>

|                                               |                             |
|-----------------------------------------------|-----------------------------|
| Zero-point correction =                       | 0.000000 (Hartree/Particle) |
| Thermal correction to Energy =                | 0.001416                    |
| Thermal correction to Enthalpy =              | 0.002360                    |
| Thermal correction to Gibbs Free Energy =     | -0.015877                   |
| Sum of electronic and zero-point Energies =   | -65.017591                  |
| Sum of electronic and thermal Energies =      | -65.016175                  |
| Sum of electronic and thermal Enthalpies =    | -65.015231                  |
| Sum of electronic and thermal Free Energies = | -65.033468                  |

Zn 0.000000 0.000000 0.000000

**[ZnL]<sup>2+</sup>**

Zero-point correction = 0.541372 (Hartree/Particle)  
Thermal correction to Energy = 0.572162  
Thermal correction to Enthalpy = 0.573107  
Thermal correction to Gibbs Free Energy = 0.480670  
Sum of electronic and zero-point Energies = -1629.043942  
Sum of electronic and thermal Energies = -1629.013151  
Sum of electronic and thermal Enthalpies = -1629.012207  
Sum of electronic and thermal Free Energies = -1629.104644

|   |              |              |              |
|---|--------------|--------------|--------------|
| N | 1.911928000  | 3.996433000  | -0.468123000 |
| C | 2.696115000  | 3.022113000  | -1.284747000 |
| C | 3.179882000  | 1.875758000  | -0.396682000 |
| N | 2.053880000  | 1.242550000  | 0.379199000  |
| C | 2.602141000  | 0.684905000  | 1.692125000  |
| C | 3.606959000  | -0.427921000 | 1.440161000  |
| C | 4.863695000  | -0.591380000 | 2.047274000  |
| C | 5.639933000  | -1.758632000 | 1.823087000  |
| C | 5.204646000  | -2.828360000 | 1.014094000  |
| C | 3.952605000  | -2.652920000 | 0.423004000  |
| C | 3.199362000  | -1.480940000 | 0.599319000  |
| N | 2.006216000  | -1.590629000 | -0.091623000 |
| C | 2.015332000  | -2.818377000 | -0.593603000 |
| O | 3.179975000  | -3.514847000 | -0.353063000 |
| C | 0.804987000  | -3.442624000 | -1.137594000 |
| C | -0.343420000 | -2.711884000 | -0.805298000 |
| C | -1.641296000 | -3.161968000 | -1.078187000 |
| C | -1.801883000 | -4.398739000 | -1.742959000 |
| C | 0.649973000  | -4.680215000 | -1.801937000 |
| C | -0.651558000 | -5.128465000 | -2.104022000 |
| C | -2.655469000 | -2.278355000 | -0.495596000 |
| O | -3.952160000 | -2.674308000 | -0.256296000 |
| C | -4.502219000 | -1.644841000 | 0.504780000  |
| C | -3.493283000 | -0.681854000 | 0.677627000  |
| N | -2.353187000 | -1.087799000 | 0.005166000  |
| C | -5.771152000 | -1.508027000 | 1.068315000  |
| C | -5.960847000 | -0.341861000 | 1.836929000  |
| C | -4.941226000 | 0.624259000  | 2.039849000  |
| C | -3.667396000 | 0.472081000  | 1.466501000  |
| C | -2.459900000 | 1.369407000  | 1.700361000  |
| N | -1.703053000 | 1.647056000  | 0.405175000  |

|    |              |              |              |
|----|--------------|--------------|--------------|
| C  | -2.617362000 | 2.352854000  | -0.561559000 |
| C  | -1.848927000 | 3.020666000  | -1.702374000 |
| N  | -0.817186000 | 3.910935000  | -1.102119000 |
| C  | 0.093345000  | 4.609065000  | -2.047126000 |
| C  | 1.321414000  | 5.108929000  | -1.269406000 |
| H  | 2.059232000  | 5.541524000  | -1.970167000 |
| H  | 1.027129000  | 5.906213000  | -0.564971000 |
| H  | 0.383753000  | 3.891660000  | -2.833905000 |
| H  | -0.402784000 | 5.456468000  | -2.552757000 |
| H  | -2.551369000 | 3.573680000  | -2.352447000 |
| H  | -1.307845000 | 4.627658000  | -0.545848000 |
| H  | -1.333175000 | 2.273568000  | -2.334046000 |
| H  | -3.176243000 | 3.119655000  | 0.005244000  |
| H  | -3.361390000 | 1.648670000  | -0.969342000 |
| H  | -1.559153000 | 0.677076000  | 0.023613000  |
| H  | -1.744845000 | 0.874057000  | 2.382155000  |
| H  | -2.748675000 | 2.331672000  | 2.155603000  |
| H  | -5.156388000 | 1.489648000  | 2.675855000  |
| H  | -6.933932000 | -0.180854000 | 2.309405000  |
| H  | -6.561952000 | -2.250769000 | 0.940838000  |
| H  | -2.796267000 | -4.797415000 | -1.963599000 |
| H  | -0.773977000 | -6.086005000 | -2.618365000 |
| H  | 1.516725000  | -5.292448000 | -2.067121000 |
| H  | -0.223815000 | -1.794695000 | -0.235549000 |
| H  | 5.802886000  | -3.733104000 | 0.884090000  |
| H  | 6.610434000  | -1.842919000 | 2.320150000  |
| H  | 5.249070000  | 0.173589000  | 2.730000000  |
| H  | 1.736453000  | 0.288781000  | 2.253206000  |
| H  | 3.035987000  | 1.514448000  | 2.274863000  |
| H  | 1.761520000  | 0.367873000  | -0.120524000 |
| H  | 3.913658000  | 2.262452000  | 0.332081000  |
| H  | 3.703805000  | 1.122937000  | -1.008362000 |
| H  | 3.560863000  | 3.505320000  | -1.776854000 |
| H  | 2.041357000  | 2.639940000  | -2.090157000 |
| H  | 2.538288000  | 4.401257000  | 0.240330000  |
| Zn | 0.311041000  | 2.578581000  | 0.252791000  |

**[Zn<sub>2</sub>L]<sup>4+</sup>**

Zero-point correction = 0.540937 (Hartree/Particle)  
Thermal correction to Energy = 0.573515  
Thermal correction to Enthalpy = 0.574459  
Thermal correction to Gibbs Free Energy = 0.478177  
Sum of electronic and zero-point Energies = -1694.132193  
Sum of electronic and thermal Energies = -1694.099615  
Sum of electronic and thermal Enthalpies = -1694.098670  
Sum of electronic and thermal Free Energies = -1694.194953

|    |             |              |              |
|----|-------------|--------------|--------------|
| Zn | 3.325951000 | -0.203560000 | -0.191933000 |
| N  | 2.237793000 | 1.812352000  | -0.002051000 |
| C  | 3.363054000 | 2.827808000  | 0.041470000  |
| C  | 4.623063000 | 2.251451000  | 0.695257000  |
| N  | 5.099981000 | 1.068237000  | -0.090866000 |
| C  | 6.207550000 | 0.281289000  | 0.566546000  |
| C  | 5.643642000 | -0.847225000 | 1.447117000  |
| N  | 4.678490000 | -1.654005000 | 0.629631000  |

|    |              |              |              |
|----|--------------|--------------|--------------|
| C  | 3.870023000  | -2.682551000 | 1.350010000  |
| C  | 2.738031000  | -3.150440000 | 0.425366000  |
| N  | 1.844182000  | -1.997306000 | 0.021394000  |
| C  | 0.887975000  | -2.384399000 | -1.104761000 |
| C  | -0.175011000 | -3.434765000 | -0.804622000 |
| C  | 0.036964000  | -4.818609000 | -0.978916000 |
| C  | -0.983538000 | -5.786741000 | -0.790044000 |
| C  | -2.299417000 | -5.436354000 | -0.441786000 |
| C  | -2.511541000 | -4.067118000 | -0.295077000 |
| C  | -1.504643000 | -3.088542000 | -0.456803000 |
| O  | -3.713001000 | -3.408116000 | 0.000645000  |
| N  | -2.123594000 | -1.855177000 | -0.239312000 |
| C  | -3.441017000 | -2.101033000 | 0.001477000  |
| Zn | -1.759659000 | 0.095519000  | -0.229562000 |
| C  | -3.964068000 | 0.242048000  | -0.282825000 |
| C  | -4.352280000 | -0.988483000 | 0.325127000  |
| C  | -5.301523000 | -0.940389000 | 1.370139000  |
| C  | -5.755332000 | 0.321089000  | 1.822078000  |
| C  | -5.143578000 | 1.529267000  | 1.411917000  |
| C  | -4.193627000 | 1.491074000  | 0.367572000  |
| C  | -3.144937000 | 2.486420000  | 0.080115000  |

|   |              |              |              |   |              |              |              |
|---|--------------|--------------|--------------|---|--------------|--------------|--------------|
| N | -1.872258000 | 2.075477000  | -0.168945000 | H | 3.473837000  | -2.228982000 | 2.277181000  |
| C | -1.094406000 | 3.219947000  | -0.352851000 | H | 5.100497000  | -0.450094000 | 2.324235000  |
| C | -1.962545000 | 4.319345000  | -0.165033000 | H | 6.473338000  | -1.466848000 | 1.830207000  |
| O | -3.241789000 | 3.818099000  | 0.115402000  | H | 6.856343000  | 0.941923000  | 1.167545000  |
| C | -1.567654000 | 5.650155000  | -0.279584000 | H | 6.832975000  | -0.141500000 | -0.238212000 |
| C | -0.216716000 | 5.827393000  | -0.626501000 | H | 5.459746000  | 1.415526000  | -0.991497000 |
| C | 0.665016000  | 4.737145000  | -0.844301000 | H | 5.398672000  | 3.037009000  | 0.747156000  |
| C | 0.269797000  | 3.390559000  | -0.695649000 | H | 4.422357000  | 1.928028000  | 1.733443000  |
| C | 1.165980000  | 2.198908000  | -1.017232000 | H | 3.045667000  | 3.735363000  | 0.581603000  |
| H | 0.162517000  | 6.844953000  | -0.760847000 | H | 3.584273000  | 3.116880000  | -1.001223000 |
| H | -2.253830000 | 6.489574000  | -0.136467000 | H | 1.688290000  | 2.366546000  | -1.975102000 |
| H | -5.372815000 | 2.463129000  | 1.935867000  | H | 0.540148000  | 1.295793000  | -1.172596000 |
| H | -6.516225000 | 0.356407000  | 2.609079000  | H | 1.682853000  | 4.970813000  | -1.172785000 |
| H | -5.649148000 | -1.854633000 | 1.862548000  | H | -3.667568000 | 0.241189000  | -1.348801000 |
| H | -3.093794000 | -6.177812000 | -0.318516000 | H | 2.151461000  | -3.942258000 | 0.921372000  |
| H | -0.743286000 | -6.842721000 | -0.946455000 | H | 1.793386000  | 1.841713000  | 0.929859000  |
| H | 1.019457000  | -5.174260000 | -1.307119000 |   |              |              |              |
| H | 1.515414000  | -2.722645000 | -1.946857000 |   |              |              |              |
| H | 0.405574000  | -1.446074000 | -1.446395000 |   |              |              |              |
| H | 1.264776000  | -1.798823000 | 0.853137000  |   |              |              |              |
| H | 3.159418000  | -3.578909000 | -0.501504000 |   |              |              |              |
| H | 5.223793000  | -2.138407000 | -0.101751000 |   |              |              |              |
| H | 4.483737000  | -3.550033000 | 1.651184000  |   |              |              |              |

## Cd<sup>2+</sup>

Zero-point correction = 0.000000 (Hartree/Particle)  
Thermal correction to Energy = 0.001416  
Thermal correction to Enthalpy = 0.002360  
Thermal correction to Gibbs Free Energy = -0.016695  
Sum of electronic and zero-point Energies = -47.43776  
Sum of electronic and thermal Energies = -47.43635  
Sum of electronic and thermal Enthalpies = -47.435406  
Sum of electronic and thermal Free Energies = -47.454462

Cd 0.000000 0.000000 0.000000

## [CdL]<sup>2+</sup>

Zero-point correction = 0.540390 (Hartree/Particle)  
Thermal correction to Energy = 0.571603  
Thermal correction to Enthalpy = 0.572547  
Thermal correction to Gibbs Free Energy = 0.478617  
Sum of electronic and zero-point Energies = -1611.396834  
Sum of electronic and thermal Energies = -1611.365622  
Sum of electronic and thermal Enthalpies = -1611.364678  
Sum of electronic and thermal Free Energies = -1611.458607

|   |             |              |              |
|---|-------------|--------------|--------------|
| N | 1.863391000 | -3.893645000 | 0.699396000  |
| C | 2.760301000 | -2.874159000 | 1.317529000  |
| C | 3.328026000 | -1.935870000 | 0.249420000  |
| N | 2.270774000 | -1.187561000 | -0.507108000 |
| C | 2.869007000 | -0.575083000 | -1.767033000 |
| C | 3.834060000 | 0.546680000  | -1.425492000 |
| C | 5.136016000 | 0.726004000  | -1.922844000 |
| C | 5.885566000 | 1.890892000  | -1.614940000 |
| C | 5.380982000 | 2.938763000  | -0.818488000 |
| C | 4.086214000 | 2.746120000  | -0.335038000 |
| C | 3.347737000 | 1.581568000  | -0.602524000 |
| N | 2.103149000 | 1.673373000  | 0.000502000  |
| C | 2.083953000 | 2.880431000  | 0.548009000  |
| O | 3.261986000 | 3.583227000  | 0.411396000  |
| C | 0.866360000 | 3.494795000  | 1.079893000  |

|   |              |              |              |
|---|--------------|--------------|--------------|
| C | -0.296656000 | 2.792827000  | 0.731192000  |
| C | -1.579847000 | 3.272943000  | 1.029519000  |
| C | -1.707415000 | 4.497378000  | 1.723991000  |
| C | 0.743482000  | 4.719395000  | 1.774776000  |
| C | -0.542297000 | 5.194826000  | 2.095074000  |
| C | -2.646854000 | 2.444966000  | 0.466095000  |
| O | -3.933517000 | 2.909641000  | 0.306924000  |
| C | -4.580190000 | 1.917241000  | -0.424535000 |
| C | -3.635101000 | 0.905128000  | -0.663983000 |
| N | -2.432791000 | 1.248714000  | -0.062988000 |
| C | -5.889209000 | 1.850574000  | -0.902360000 |
| C | -6.193203000 | 0.698519000  | -1.654768000 |
| C | -5.243704000 | -0.321970000 | -1.919229000 |
| C | -3.927804000 | -0.238752000 | -1.433204000 |
| C | -2.792904000 | -1.206979000 | -1.733882000 |
| N | -1.995101000 | -1.530566000 | -0.480247000 |
| C | -2.850505000 | -2.289891000 | 0.490554000  |
| C | -2.070492000 | -2.784623000 | 1.711590000  |
| N | -0.981190000 | -3.697245000 | 1.271501000  |
| C | -0.031893000 | -4.132682000 | 2.327056000  |
| C | 1.199042000  | -4.795168000 | 1.685925000  |
| H | 1.901323000  | -5.106753000 | 2.482070000  |
| H | 0.893276000  | -5.708729000 | 1.146639000  |
| H | 0.256903000  | -3.240786000 | 2.911879000  |
| H | -0.496736000 | -4.841401000 | 3.037522000  |
| H | -2.767146000 | -3.280305000 | 2.413645000  |

|   |              |              |              |
|---|--------------|--------------|--------------|
| H | -1.415938000 | -4.537481000 | 0.863116000  |
| H | -1.609962000 | -1.937804000 | 2.253926000  |
| H | -3.288072000 | -3.150084000 | -0.048982000 |
| H | -3.692285000 | -1.658690000 | 0.825305000  |
| H | -1.823236000 | -0.578318000 | -0.070235000 |
| H | -2.087151000 | -0.751158000 | -2.451576000 |
| H | -3.161444000 | -2.147957000 | -2.175113000 |
| H | -5.547013000 | -1.176689000 | -2.533230000 |
| H | -7.202844000 | 0.591135000  | -2.061170000 |
| H | -6.628418000 | 2.634042000  | -0.720581000 |
| H | -2.693196000 | 4.908321000  | 1.960085000  |
| H | -0.639466000 | 6.142777000  | 2.631987000  |
| H | 1.628780000  | 5.300250000  | 2.049068000  |
| H | -0.200463000 | 1.882325000  | 0.142933000  |

|    |             |              |              |
|----|-------------|--------------|--------------|
| H  | 5.963322000 | 3.840215000  | -0.614429000 |
| H  | 6.892985000 | 1.988853000  | -2.029181000 |
| H  | 5.580054000 | -0.027077000 | -2.582556000 |
| H  | 2.025712000 | -0.174226000 | -2.357010000 |
| H  | 3.346614000 | -1.375474000 | -2.355653000 |
| H  | 1.991907000 | -0.343316000 | 0.043162000  |
| H  | 3.903465000 | -2.526133000 | -0.486551000 |
| H  | 4.036728000 | -1.231808000 | 0.719345000  |
| H  | 3.598586000 | -3.352591000 | 1.859586000  |
| H  | 2.180428000 | -2.304119000 | 2.066952000  |
| H  | 2.431562000 | -4.473197000 | 0.068001000  |
| Cd | 0.229173000 | -2.442948000 | -0.401182000 |

#### [Cd<sub>2</sub>L]<sup>4+</sup>

Zero-point correction = 0.538929 (Hartree/Particle)  
Thermal correction to Energy = 0.572261  
Thermal correction to Enthalpy = 0.573206  
Thermal correction to Gibbs Free Energy = 0.473778  
Sum of electronic and zero-point Energies = -1658.827655  
Sum of electronic and thermal Energies = -1658.794323  
Sum of electronic and thermal Enthalpies = -1658.793379  
Sum of electronic and thermal Free Energies = -1658.892807

|    |              |              |              |
|----|--------------|--------------|--------------|
| Cd | 3.123218000  | -0.245333000 | -0.323499000 |
| N  | 2.097965000  | 2.028352000  | -0.076522000 |
| C  | 3.299181000  | 2.931195000  | 0.113710000  |
| C  | 4.433084000  | 2.267141000  | 0.912302000  |
| N  | 5.004572000  | 1.103994000  | 0.162161000  |
| C  | 5.990260000  | 0.263338000  | 0.932432000  |
| C  | 5.328543000  | -0.903744000 | 1.692322000  |
| N  | 4.543431000  | -1.771048000 | 0.754923000  |
| C  | 3.681197000  | -2.815898000 | 1.384954000  |
| C  | 2.641069000  | -3.340570000 | 0.379954000  |
| N  | 1.652974000  | -2.274297000 | -0.042071000 |
| C  | 0.726871000  | -2.754952000 | -1.159288000 |
| C  | -0.386385000 | -3.715482000 | -0.773025000 |
| C  | -0.269406000 | -5.119074000 | -0.849901000 |
| C  | -1.348341000 | -5.995654000 | -0.563800000 |
| C  | -2.624622000 | -5.530002000 | -0.200000000 |
| C  | -2.741868000 | -4.141866000 | -0.146111000 |
| C  | -1.678999000 | -3.253377000 | -0.416159000 |
| O  | -3.873327000 | -3.376700000 | 0.163773000  |
| N  | -2.192393000 | -1.967450000 | -0.254956000 |
| C  | -3.504789000 | -2.091367000 | 0.067144000  |
| Cd | -1.544522000 | 0.106356000  | -0.488557000 |
| C  | -3.965897000 | 0.296897000  | -0.201099000 |
| C  | -4.328179000 | -0.926148000 | 0.431988000  |
| C  | -5.199233000 | -0.864832000 | 1.544209000  |
| C  | -5.599827000 | 0.397452000  | 2.034668000  |
| C  | -5.003769000 | 1.593053000  | 1.576502000  |
| C  | -4.131736000 | 1.545005000  | 0.464613000  |
| C  | -3.134386000 | 2.574201000  | 0.126310000  |
| N  | -1.861052000 | 2.250040000  | -0.209328000 |
| C  | -1.148891000 | 3.440181000  | -0.344477000 |
| C  | -2.054246000 | 4.480804000  | -0.044389000 |
| O  | -3.292491000 | 3.899348000  | 0.257006000  |
| C  | -1.715981000 | 5.832694000  | -0.069740000 |
| C  | -0.384484000 | 6.095784000  | -0.439420000 |
| C  | 0.536786000  | 5.065233000  | -0.760121000 |
| C  | 0.197245000  | 3.696858000  | -0.708340000 |
| C  | 1.132965000  | 2.574345000  | -1.128706000 |
| H  | -0.052182000 | 7.136425000  | -0.501627000 |

|   |              |              |              |
|---|--------------|--------------|--------------|
| H | -2.428884000 | 6.628619000  | 0.163174000  |
| H | -5.185083000 | 2.533816000  | 2.106617000  |
| H | -6.302477000 | 0.442213000  | 2.873212000  |
| H | -5.528094000 | -1.778720000 | 2.049775000  |
| H | -3.458473000 | -6.205606000 | 0.010367000  |
| H | -1.185722000 | -7.074550000 | -0.646183000 |
| H | 0.678889000  | -5.563453000 | -1.170838000 |
| H | 1.369277000  | -3.206612000 | -1.933692000 |
| H | 0.290647000  | -1.846983000 | -1.628989000 |
| H | 1.059781000  | -2.108503000 | 0.786929000  |
| H | 3.142858000  | -3.704586000 | -0.534174000 |
| H | 5.208256000  | -2.241285000 | 0.121757000  |
| H | 4.282545000  | -3.667775000 | 1.750974000  |
| H | 3.188463000  | -2.371653000 | 2.269622000  |
| H | 4.635525000  | -0.535040000 | 2.471514000  |
| H | 6.117999000  | -1.478030000 | 2.210251000  |
| H | 6.553944000  | 0.885311000  | 1.650680000  |
| H | 6.723210000  | -0.127750000 | 0.206128000  |
| H | 5.494959000  | 1.474378000  | -0.663754000 |
| H | 5.210775000  | 3.027592000  | 1.112245000  |
| H | 4.074194000  | 1.912539000  | 1.896176000  |
| H | 2.998900000  | 3.862744000  | 0.624400000  |
| H | 3.664133000  | 3.207177000  | -0.891558000 |
| H | 1.746597000  | 2.889102000  | -1.989866000 |
| H | 0.534273000  | 1.712402000  | -1.496802000 |
| H | 1.539266000  | 5.361108000  | -1.087305000 |
| H | -3.722714000 | 0.291779000  | -1.279735000 |
| H | 2.108391000  | -4.196847000 | 0.829651000  |
| H | 1.594405000  | 2.037475000  | 0.824906000  |

## References

1. Shrivastava, A.; Gupta, V.B. Methods for the Determination of Limit of Detection and Limit of Quantitation of the Analytical Methods. *Chronicles Young Sci.* **2011**, *2*, 21–25, doi:10.4103/2229-5186.79345.
2. Ambrosi, G.; Formica, M.; Fusi, V.; Giorgi, L.; Macedi, E.; Micheloni, M.; Piersanti, G.; Pontellini, R. New Family of Polyamine Macrocycles Containing 2,5-Diphenyl[1,3,4] Oxadiazole as a Signaling Unit. Synthesis, Acid-Base and Spectrophotometric Properties. *Org. Biomol. Chem.* **2010**, *8*, 1471–1478, doi:10.1039/b921053a.
3. Ambrosi, G.; Formica, M.; Fusi, V.; Giorgi, L.; MacEdi, E.; Micheloni, M.; Paoli, P.; Pontellini, R.; Rossi, P. Efficient Fluorescent Sensors Based on 2,5-Diphenyl[1,3,4]Oxadiazole: A Case of Specific Response to Zn(II) at Physiological PH. *Inorg. Chem.* **2010**, *49*, 9940–9948, doi:10.1021/ic101210d.
4. Formica, M.; Ambrosi, G.; Fusi, V.; Giorgi, L.; Arca, M.; Garau, A.; Pintus, A.; Lippolis, V. CdII/ZnII Discrimination Using 2,5-Diphenyl[1,3,4]Oxadiazole Based Fluorescent Chemosensors. *New J. Chem.* **2018**, *42*, 7869–7883, doi:10.1039/C8NJ00113H.
5. Ambrosi, G.; Fanelli, M.; Paoli, P.; Formica, M.; Paderni, D.; Rossi, P.; Micheloni, M.; Giorgi, L.; Fusi, V. Zn(II) Detection and Biological Activity of a Macrocycle Containing a Bis(Oxadiazole)Pyridine Derivative as Fluorophore. *Dalt. Trans.* **2020**, *49*, 7496–7506, doi:10.1039/C9DT03910D.
6. Perdew, J.P. Density-Functional Approximation for the Correlation Energy of the Inhomogeneous Electron Gas. *Phys. Rev. B* **1986**, *33*, 8822, doi:10.1103/PhysRevB.33.8822.
7. Perdew, J.P. Erratum: Density-Functional Approximation for the Correlation Energy of the Inhomogeneous Electron Gas. *Phys. Rev. B* **1986**, *34*, 7406, doi:10.1103/PhysRevB.34.7406.
8. Becke, A.D. Density-Functional Exchange-Energy Approximation with Correct Asymptotic Behavior. *Phys. Rev. A* **1988**, *38*, 3098, doi:10.1103/PhysRevA.38.3098.
9. Kim, K.; D. Jordan, K. Comparison of Density Functional and MP2 Calculations on the Water Monomer and Dimer. *J. Phys. Chem.* **2002**, *98*, 10089–10094, doi:10.1021/j100091a024.
10. Stephens, P.J.; Devlin, F.J.; Chabalowski, C.F.; Frisch, M.J. Ab Initio Calculation of Vibrational Absorption and Circular Dichroism Spectra Using Density Functional Force Fields. *J. Phys. Chem.* **2002**, *98*, 11623–11627, doi:10.1021/j100096a001.
11. Cramer, C.J. *Essentials of Computational Chemistry: Theories and Models, 2nd Edition* | Wiley; Wiley, 2004; ISBN 978-0-470-09182-1.
12. Frisch, M.J.; Trucks, G.W.; Schlegel, H.B.; Scuseria, G.E.; Robb, M.A.; Cheeseman, J.R.; Scalmani, G.; Barone, V.; Mennucci, B.; Petersson, G.A. Gaussian 09 2009.
13. Schäfer, A.; Huber, C.; Ahlrichs, R. Fully Optimized Contracted Gaussian Basis Sets of Triple Zeta Valence Quality for Atoms Li to Kr. *J. Chem. Phys.* **1998**, *100*, 5829, doi:10.1063/1.467146.
